# Supplementary material for: Mitochondrial hydrogen peroxide positively regulates neuropeptide secretion during diet-induced activation of the oxidative stress response
Source: PubMed Central journal article supplement (PMC8052458; doi:10.1038/s41467-021-22561-x), 2021-04-16
Supplement: 41467_2021_22561_MOESM1_ESM.pdf [file 41467_2021_22561_MOESM1_ESM.pdf]

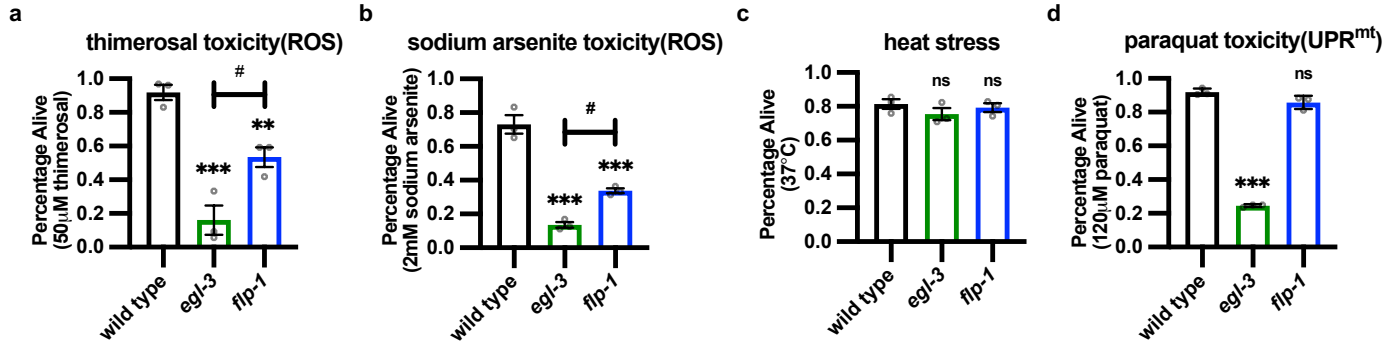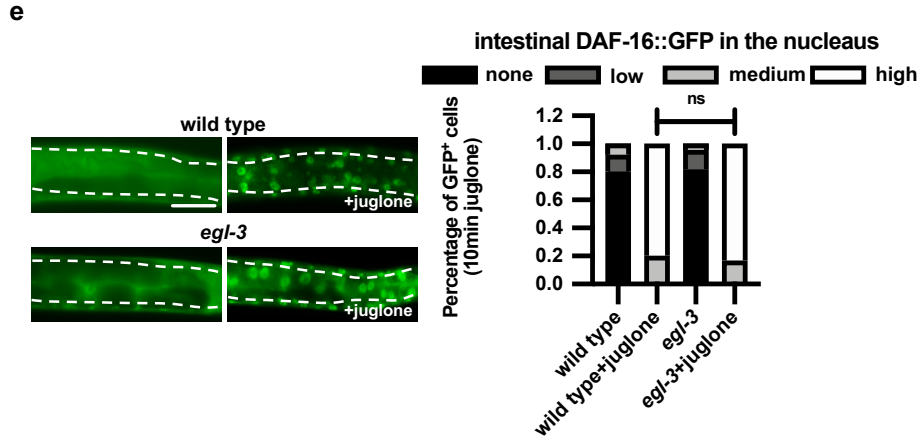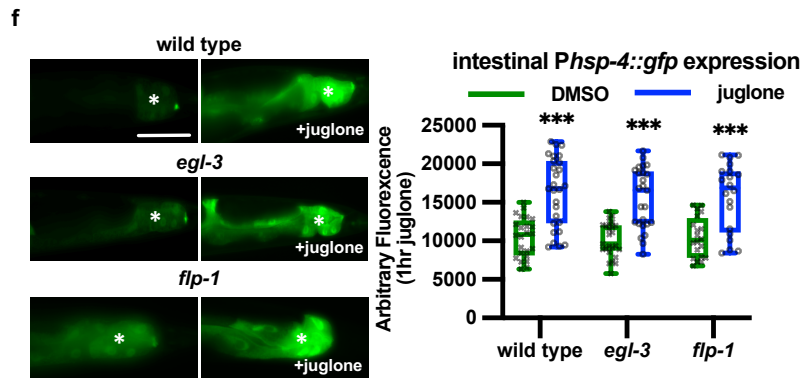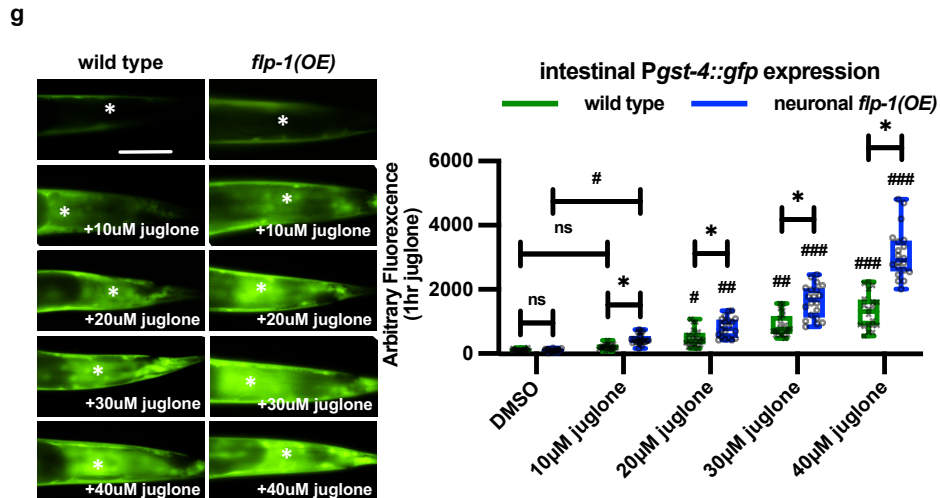

## Supplementary Figure 1. EGL-3 and FLP-1 signaling regulate specific stress responses.

(a-d) Percentage of surviving animals of the indicated strains following treatment of young adults with the indicated stressors and 16 hour recovery. Data are mean values  $\pm$  s.e.m. n=116, 57, 78; 147, 96, 108; 154, 90, 126; 70, 49, 78 biologically independent samples over 3 independent experiments. \*\*\*  $P < 0.001$ , n.s not significant by Student's two-tailed  $t$ -test. #  $P < 0.05$  by one-way ANOVA with Dunnett's test. (e) Representative images and quantification of nuclear fluorescence the posterior regions of transgenic animals expressing *daf-16::gfp* after 10min of DMSO or juglone treatment. Fewer than 10, between 11 and 20, and above 20 fluorescent nuclei are denoted Low, Medium, and High, respectively. n=25, 35, 22, 24 biologically independent samples. #  $P < 0.05$  by one-way ANOVA with Dunnett's test. Scale bar: 100 $\mu$ m. (f) Representative images and quantification of the posterior regions of transgenic animals expressing the ER stress marker *Phsp-4::gfp* after 1hour of DMSO or juglone treatment and 4 hours recovery. Asterisks mark the intestinal region used for quantitative analysis. The boxes span the interquartile range, median is marked by the line and whiskers indicate the minimum and the maximum values. n=20 biologically independent samples. \*\*\*  $P < 0.001$  by Student's two-tailed  $t$ -test. n.s not significant by one-way ANOVA with Dunnett's test. Scale bar: 50 $\mu$ m. (g) Representative images and quantification of *Pgst-4::gfp* expression in wild type or *flp-1* overexpressing animals (*flp-1(OE)*) following treatment with the indicated concentrations of juglone or vehicle (DMSO). *Pgst-4::gfp* expression in body wall muscles, which appears as fluorescence on the edge of animals in some images, was not quantified. The boxes span the interquartile range, median is marked by the line and whiskers indicate the minimum and the maximum values. n=20, 20, 21, 17, 21, 20, 23, 21, 21, 21 biologically independent samples. \*  $P < 0.05$ , n.s not significant by Student's two-tailed  $t$ -test. #  $P < 0.05$ , ##  $P < 0.01$ , ###  $P < 0.001$  by one-way ANOVA with Dunnett's test. Scale bar: 50 $\mu$ m.

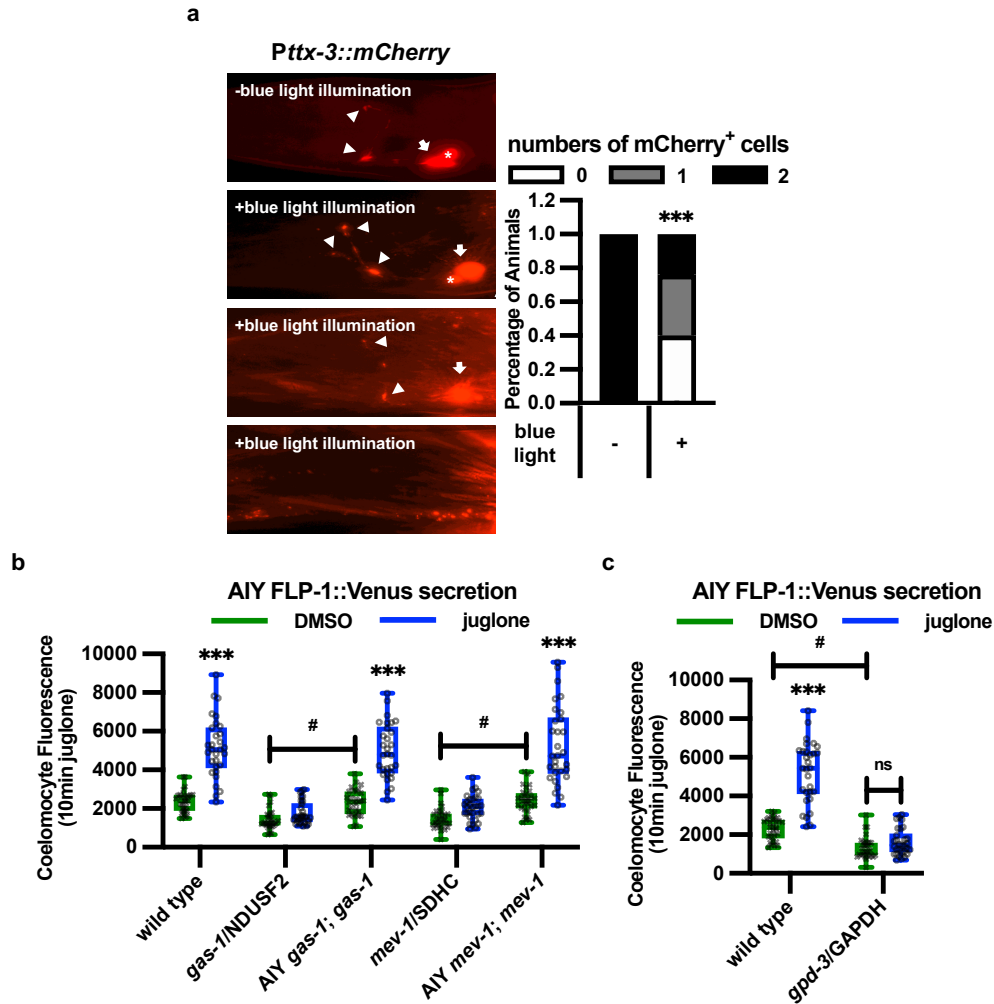

### Supplementary Figure 2. mito-miniSOG-induced AIY ablation and effects of ATP-generating mutants on FLP-1 secretion.

(a) Representative images and quantification of mCherry marked AIY neurons from transgenic animals expressing mito-miniSOG under the control *ttx-3* promoter after 30min of 50mW/cm<sup>2</sup> blue light illumination and overnight recovery on NGM plates. Efficiency of mito-miniSOG-induced cell ablation was measured by counting the number of visible mCherry-marked AIY neurons. Arrows indicate somas, asterisks indicate somas of the second AIY and arrowheads indicate axons. n=50 biologically independent samples. \*\*\*  $P < 0.001$ . Scale bar: 10 $\mu$ m. (b) Quantification of average coelomocyte fluorescence of the indicated mutants expressing FLP-1::Venus fusion proteins in AIY following vehicle (DMSO) or juglone treatment for 10 minutes. AIY *gas-1* denotes transgenes expressing *gas-1* under the *ttx-3* promoter. AIY *mev-1* denotes transgenes expressing *mev-1* cDNA under the *ttx-3* promoter. NDUSF2, NADH:ubiquinone oxidoreductase core subunit S2; SDHC, succinate dehydrogenase complex subunit C. The boxes span the interquartile range, median is marked by the line and whiskers indicate the minimum and the maximum values. n=30 biologically independent samples. \*\*\*  $P < 0.001$  by Student's two-tailed *t*-test. #  $P < 0.05$  by one-way ANOVA with Dunnett's test. (c) Quantification of average

coelomocyte fluorescence of the indicated mutants expressing FLP-1::Venus fusion proteins in AIY following vehicle (DMSO) or juglone treatment for 10 minutes. GAPDH, glyceraldehyde-3-phosphate dehydrogenase. The boxes span the interquartile range, median is marked by the line and whiskers indicate the minimum and the maximum values. n=30 biologically independent samples. \*\*\*  $P < 0.001$ , n.s not significant by Student's two-tailed  $t$ -test. #  $P < 0.05$  by one-way ANOVA with Dunnett's test.



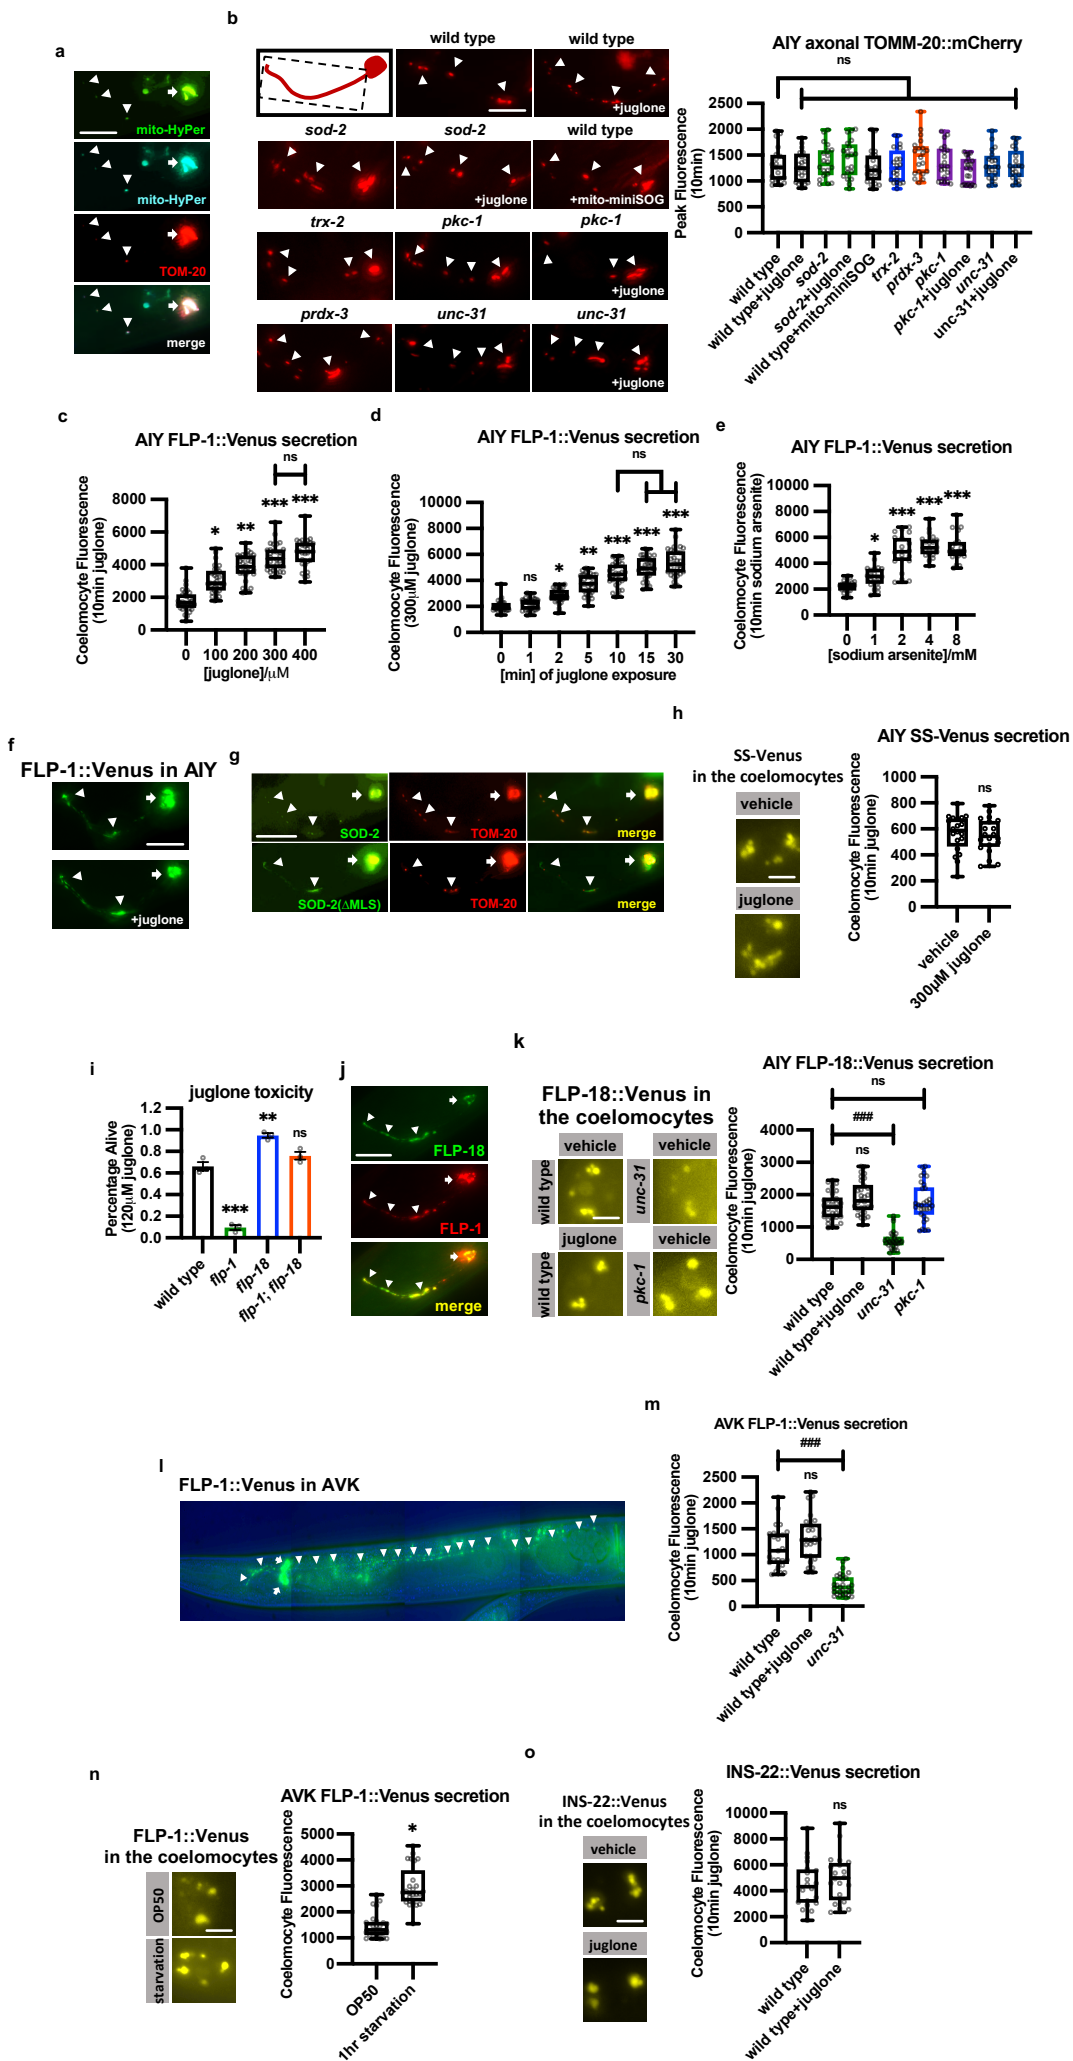

### Supplementary Figure 3. Specificity of juglone-induced FLP-1 secretion from AIY.

(a) Representative images showing co-localization of mito-HyPer puncta in the YFP or CFP channels with the mitochondrial marker TOMM-20::mCherry in AIY axons. Scale bar: 10 $\mu$ m. (b) Representative images and quantification of mCherry fluorescence from the indicated mutants co-expressing mito-HyPer and TOMM-20::mCherry in AIY axons with or without 10 minutes of the indicated oxidative stress treatments. The boxes span the interquartile range, median is marked by the line and whiskers indicate the minimum and the maximum values. n=20 biologically independent samples. n.s not significant by one-way ANOVA with Dunnett's test. Scale bar: 10 $\mu$ m. (c) Quantification of average coelomocyte fluorescence intensity following exposure of FLP-1::Venus-expressing animals to the indicated juglone concentrations for 10 minutes. The boxes span the interquartile range, median is marked by the line and whiskers indicate the minimum and the maximum values. n=30 biologically independent samples. \*  $P < 0.05$ , \*\*  $P < 0.01$ , \*\*\*  $P < 0.001$ , n.s not significant by Student's two-tailed  $t$ -test. (d) Quantification of average coelomocyte fluorescence following exposure of FLP-1::Venus-expressing animals to 300 $\mu$ M juglone for the indicated number of minutes. The boxes span the interquartile range, median is marked by the line and whiskers indicate the minimum and the maximum values. n=30 biologically independent samples. \*  $P < 0.05$ , \*\*  $P < 0.01$ , \*\*\*  $P < 0.001$ , n.s not significant by Student's two-tailed  $t$ -test. (e) Quantification of average coelomocyte fluorescence intensity following exposure of FLP-1::Venus-expressing animals to the indicated sodium arsenite concentrations for 10 minutes. The boxes span the interquartile range, median is marked by the line and whiskers indicate the minimum and the maximum values. n=30 biologically independent samples. \*  $P < 0.05$ , \*\*\*  $P < 0.001$  by Student's two-tailed  $t$ -test. (f) Representative image of AIY in adult animals expressing FLP-1::Venus in AIY following 10 minutes of vehicle (DMSO) or juglone treatment. Scale bar: 10 $\mu$ m. (g) Representative images showing that SOD-2::GFP puncta co-localized with TOMM-20::mCherry puncta in AIY axons. In contrast, SOD-2( $\Delta$ MLS)::GFP fusion proteins adopted a diffuse pattern of localization in AIY axons. Scale bar: 10 $\mu$ m. (h) Representative images and quantification of average coelomocyte fluorescence following exposure of animals expressing constitutively secreted Venus in AIY (*Pttx-3::ss-Venus*) to juglone for 10 minutes. The boxes span the interquartile range, median is marked by the line and whiskers indicate the minimum and the maximum values. n=20 biologically independent samples. n.s not significant by Student's two-tailed  $t$ -test. Scale bar: 5 $\mu$ m. (i) Percentage of surviving animals of the indicated strains 16 hours following treatment of young adults with juglone for 4 hours. Data are mean values  $\pm$  s.e.m. n=89, 74, 123, 88 biologically independent samples over 3 independent experiments. \*\*  $P < 0.01$ , \*\*\*  $P < 0.001$ , n.s not significant by Student's two-tailed  $t$ -test. (j) Representative images of AIY axons of adults co-expressing FLP-18::Venus and FLP-1::mCherry. Arrowheads denote axonal puncta and arrows denote the AIY soma. Scale bar: 5 $\mu$ m. (k) Representative images and quantification of average coelomocyte fluorescence following exposure of animals expressing FLP-18::Venus in AIY to juglone. The boxes span the interquartile range, median is marked by the line and whiskers indicate the minimum and the maximum values. n=30 biologically independent samples. ###  $P < 0.001$ , n.s not significant by Student's two-tailed  $t$ -test. Scale bar: 5 $\mu$ m. (l) Representative image of an adult expressing FLP-1::Venus in AVK using the *flp-1*(513bp) promoter. Arrowheads denote FLP-1::Venus puncta in the AVK axon and arrows denote AVK soma. Scale bar: 30 $\mu$ m.

(m) Quantification of average coelomocyte fluorescence following exposure of animals expressing FLP-1::Venus in AVK to juglone. The boxes span the interquartile range, median is marked by the line and whiskers indicate the minimum and the maximum values. n=25, 25, 30 biologically independent samples. ###  $P < 0.001$ , n.s not significant by Student's two-tailed  $t$ -test. (n) Representative images and quantification of average coelomocyte fluorescence following exposure of animals expressing FLP-1::Venus in AVK to starvation for 1 hour. The boxes span the interquartile range, median is marked by the line and whiskers indicate the minimum and the maximum values. n=25 biologically independent samples. \*  $P < 0.05$  by Student's two-tailed  $t$ -test. Scale bar: 5 $\mu$ m. (o) Representative images and quantification of average coelomocyte fluorescence following exposure of animals expressing INS-22::Venus in motor neurons (under the *unc-129* promoter) to juglone. The boxes span the interquartile range, median is marked by the line and whiskers indicate the minimum and the maximum values. n=20 biologically independent samples. n.s not significant by Student's two-tailed  $t$ -test. n.s not significant by Student's two-tailed  $t$ -test. Scale bar: 5 $\mu$ m.

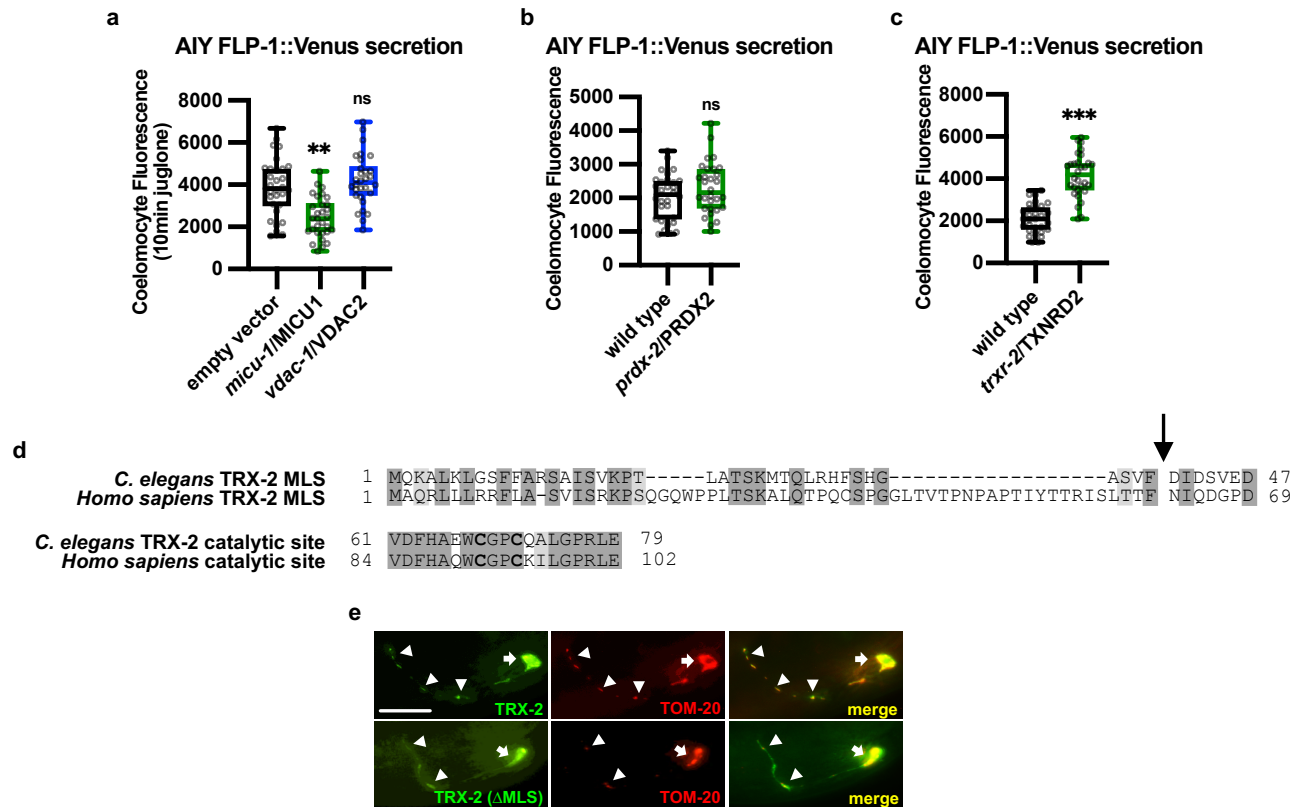

### Supplementary Figure 4. The peroxiredoxin-thioredoxin system negatively regulates FLP-1::Venus secretion from AIY.

(a) Quantification of average coelomocyte fluorescence intensity in animals subject to RNAi-mediated knockdown of the indicated genes. The boxes span the interquartile range, median is marked by the line and whiskers indicate the minimum and the maximum values.  $n=20$  biologically independent samples. \*\*  $P < 0.01$ , n.s not significant by Student's two-tailed  $t$ -test. (b) Quantification of average coelomocyte fluorescence intensity of *prdx-2*/peroxiredoxin2 mutants expressing FLP-1::Venus in AIY. The boxes span the interquartile range, median is marked by the line and whiskers indicate the minimum and the maximum values.  $n=30$  biologically independent samples. n.s not significant by Student's two-tailed  $t$ -test. (c) Quantification of average coelomocyte fluorescence intensity of *trxr-2*/thioredoxin reductase2 mutants expressing FLP-1::Venus in AIY. The boxes span the interquartile range, median is marked by the line and whiskers indicate the minimum and the maximum values.  $n=30$  biologically independent samples. \*\*\*  $P < 0.001$ , n.s not significant by Student's two-tailed  $t$ -test. (d) Amino acid sequence alignment of human TRX2 and *C. elegans* TRX-2 showing the mitochondrial localization sequence that was truncated (arrow) and the positions of the conserved cysteines (bold) that were mutated to alanine to generate catalytically inactive TRX-2 (C68A, C71A). (e) Representative images of AIY in animals co-expressing the mitochondrial marker TOMM-20::mCherry and either wild type TRX-2::GFP or TRX-2( $\Delta$ MLS)::GFP, which lacks the TRX-2 mitochondrial localization sequence. Scale bar: 10 $\mu$ m.

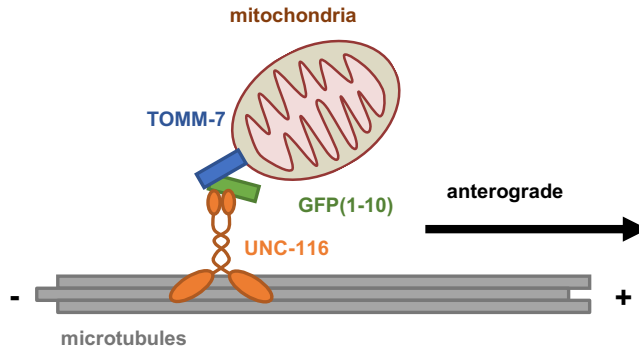

**Supplementary Figure 5. TOMM-7::UNC-116 fusion protein schematic**

Schematic showing how TOMM-7::UNC-116 fusion proteins can restore anterograde mitochondrial trafficking to *ric-7* mutants, adapted from (RAWSON *et al.* 2014).

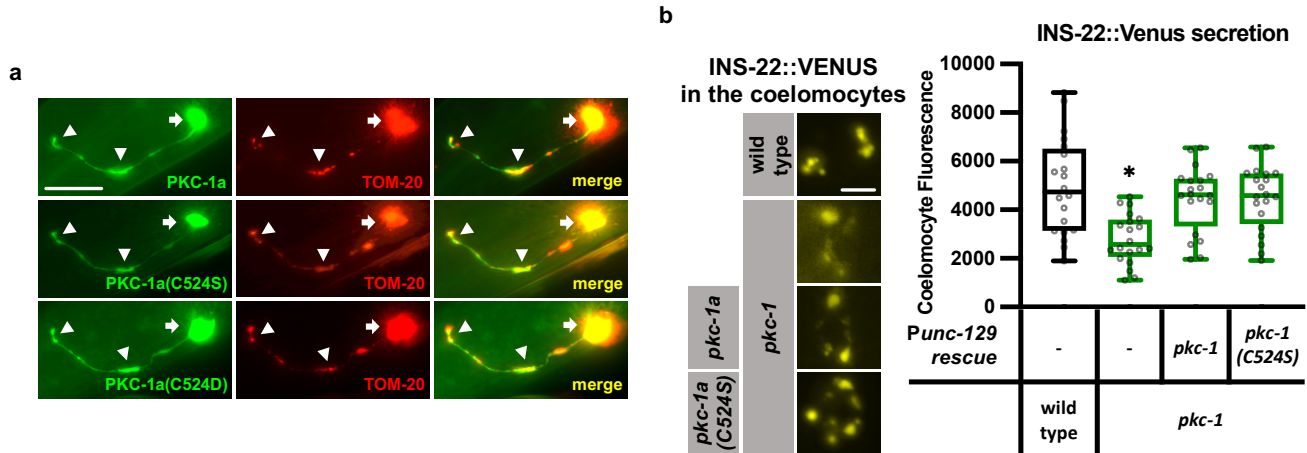

**Supplementary Figure 6. Localization of PKC-1 in AIY and juglone-induced INS-22 secretion.**

(a) Representative images of AIY axons from animals co-expressing the indicated PKC-1::GFP fusion proteins and TOMM-20::mCherry under the *ttx-3* promoter. Scale bar: 10 $\mu$ m. (b) Representative images and quantification of average coelomocyte fluorescence intensity of the indicated mutants expressing INS-22::Venus in DA/DB motor neurons (under the *unc-129* promoter) following 10 minute treatment with juglone. The boxes span the interquartile range, median is marked by the line and whiskers indicate the minimum and the maximum values. n=20 biologically independent samples. \*  $P < 0.05$  by Student's two-tailed *t*-test. n.s not significant by one-way ANOVA with Dunnett's test. Scale bar: 5 $\mu$ m.

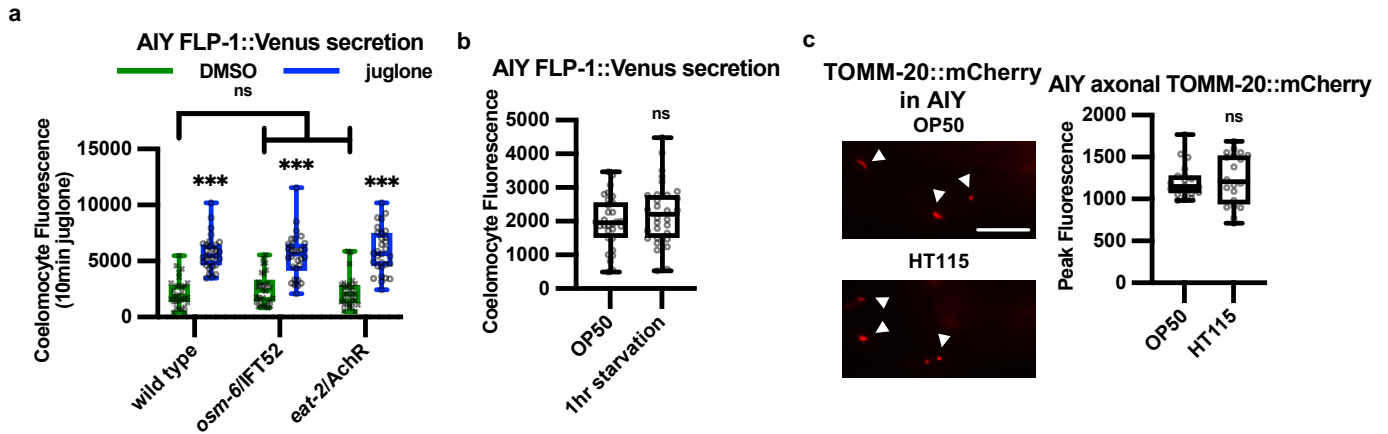

### Supplementary Figure 7. Sensory input or starvation do not impact FLP-1 secretion.

(a) Quantification of average coelomocyte fluorescence intensity of the indicated mutants expressing FLP-1::Venus in AIY following juglone treatment. The boxes span the interquartile range, median is marked by the line and whiskers indicate the minimum and the maximum values.  $n=30$  biologically independent samples. \*\*\*  $P < 0.001$  by Student's two-tailed  $t$ -test. n.s not significant by one-way ANOVA with Dunnett's test. (b) Quantification of average coelomocyte fluorescence intensity of the indicated mutants expressing FLP-1::Venus in AIY following 1 hour starvation. The boxes span the interquartile range, median is marked by the line and whiskers indicate the minimum and the maximum values.  $n=30$  biologically independent samples. n.s not significant by Student's two-tailed  $t$ -test. (c) Representative images and quantification of TOMM-20::mCherry punctal fluorescence in AIY axons of animals grown on OP50 or HT115 bacteria. The boxes span the interquartile range, median is marked by the line and whiskers indicate the minimum and the maximum values.  $n=20$  biologically independent samples. n.s not significant by Student's two-tailed  $t$ -test. Scale bar:  $10\mu\text{m}$ .

**Table S1: neuropeptide screening for juglone toxicity**

| <b>RNAi</b>   | <b>Juglone Survival**</b> | <b>RNAi</b>   | <b>Juglone Survival**</b> |
|---------------|---------------------------|---------------|---------------------------|
| <b>egl-3</b>  | 20%*                      | <b>nlp-14</b> | 91%                       |
| <b>flp-1</b>  | 63%*                      | <b>nlp-15</b> | 88%                       |
| <b>flp-2</b>  | 72%*                      | <b>nlp-16</b> | 81%                       |
| <b>flp-3</b>  | 85%                       | <b>nlp-17</b> | 86%                       |
| <b>flp-4</b>  | 96%                       | <b>nlp-18</b> | 96%                       |
| <b>flp-5</b>  | 102%                      | <b>nlp-19</b> | 91%                       |
| <b>flp-6</b>  | 124%*                     | <b>nlp-20</b> | 90%                       |
| <b>flp-7</b>  | 83%                       | <b>nlp-21</b> | 122%*                     |
| <b>flp-8</b>  | 103%                      | <b>nlp-22</b> | 99%                       |
| <b>flp-9</b>  | 93%                       | <b>nlp-23</b> | 101%                      |
| <b>flp-10</b> | 94%                       | <b>nlp-24</b> | 93%                       |
| <b>flp-11</b> | 85%                       | <b>nlp-25</b> | 84%                       |
| <b>flp-12</b> | 72%*                      | <b>nlp-26</b> | 105%                      |
| <b>flp-13</b> | 89%                       | <b>nlp-27</b> | 96%                       |
| <b>flp-14</b> | 89%                       | <b>nlp-28</b> | 96%                       |
| <b>flp-15</b> | 94%                       | <b>nlp-29</b> | 99%                       |
| <b>flp-16</b> | 88%                       | <b>nlp-30</b> | 99%                       |
| <b>flp-17</b> | 98%                       | <b>nlp-31</b> | 95%                       |
| <b>flp-18</b> | 109%                      | <b>nlp-32</b> | 98%                       |
| <b>flp-19</b> | 101%                      | <b>nlp-33</b> | 97%                       |
| <b>flp-20</b> | 95%                       | <b>nlp-34</b> | 100%                      |
| <b>flp-21</b> | 102%                      | <b>nlp-35</b> | 102%                      |
| <b>flp-22</b> | 78%                       | <b>nlp-36</b> | 104%                      |
| <b>flp-23</b> | 102%                      | <b>nlp-37</b> | 83%                       |
| <b>flp-24</b> | 86%                       | <b>nlp-38</b> | 95%                       |
| <b>flp-25</b> | 113%                      | <b>nlp-39</b> | 96%                       |
| <b>flp-26</b> | 101%                      | <b>nlp-40</b> | 90%                       |
| <b>flp-27</b> | 100%                      | <b>nlp-41</b> | 93%                       |
| <b>flp-28</b> | 98%                       | <b>nlp-42</b> | 104%                      |
| <b>flp-32</b> | 83%                       | <b>nlp-43</b> | 95%                       |
| <b>flp-33</b> | 98%                       | <b>nlp-44</b> | 92%                       |
| <b>flp-34</b> | 90%                       | <b>nlp-45</b> | 108%                      |
| <b>nlp-1</b>  | 94%                       | <b>nlp-46</b> | 100%                      |
| <b>nlp-2</b>  | 89%                       | <b>nlp-47</b> | 101%                      |
| <b>nlp-3</b>  | 67%*                      | <b>nlp-48</b> | 124%*                     |
| <b>nlp-4</b>  | 108%                      | <b>nlp-49</b> | 97%                       |
| <b>nlp-5</b>  | 103%                      | <b>nlp-50</b> | 97%                       |



|               |      |               |      |
|---------------|------|---------------|------|
| <b>nlp-6</b>  | 95%  | <b>nlp-51</b> | 92%  |
| <b>nlp-7</b>  | 95%  | <b>nlp-52</b> | 94%  |
| <b>nlp-8</b>  | 99%  | <b>nlp-53</b> | 98%  |
| <b>nlp-9</b>  | 88%  | <b>nlp-54</b> | 114% |
| <b>nlp-10</b> | 76%* | <b>nlp-55</b> | 60%* |
| <b>nlp-11</b> | 91%  | <b>nlp-56</b> | 109% |
| <b>nlp-12</b> | 93%  | <b>nlp-57</b> | 103% |
| <b>nlp-13</b> | 99%  |               |      |

---

\*denotes  $p < 0.05$ , compared to empty vector controls

\*\*denotes percentage of surviving animals normalized to empty vector controls  
animals were fed with bacteria expressing dsRNA corresponding to the indicated genes

**Table S2: GPCR screening for juglone toxicity**

| RNAi                                                          | Juglone Survival** | mutants | Juglone Survival** | reference                                    |
|---------------------------------------------------------------|--------------------|---------|--------------------|----------------------------------------------|
| <b>GPCR expressed in the intestine</b>                        |                    |         |                    |                                              |
| npr-20                                                        | 96%                |         |                    | (Cao et al., 2017)                           |
| npr-28                                                        | 104%               |         |                    | (Cao et al., 2017)                           |
| nmur-4                                                        | 84%                | ok1381  | 98%                | (Cao et al., 2017)                           |
| npr-23                                                        | 95%                |         |                    | (Cao et al., 2017;<br>Kaletsky et al., 2018) |
| npr-26                                                        | 101%               |         |                    | (Cao et al., 2017)                           |
| npr-8                                                         | 94%                |         |                    | (Cao et al., 2017)                           |
| npr-4                                                         | 68%*               | tm1782  | 25%                | (Cao et al., 2017;<br>Kaletsky et al., 2018) |
| npr-12                                                        | 94%                |         |                    | (Cao et al., 2017)                           |
| frpr-19                                                       | 91%                |         |                    | (Cao et al., 2017)                           |
| npr-30                                                        | 92%                |         |                    | (Cao et al., 2017)                           |
| W10C4.1                                                       | 59%*               |         |                    | (Kaletsky et al., 2018)                      |
| gnrr-2                                                        | 64%*               |         |                    | (Kaletsky et al., 2018)                      |
| M04G7.3                                                       | 107%               |         |                    | (Kaletsky et al., 2018)                      |
| lat-1                                                         | 101%               |         |                    | (Kaletsky et al., 2018)                      |
| pdfr-1                                                        | 99%                |         |                    | (Kaletsky et al., 2018)                      |
| lat-2                                                         | 104%               |         |                    | (Kaletsky et al., 2018)                      |
| B0334.6                                                       | 99%                |         |                    | (Kaletsky et al., 2018)                      |
| F32D8.10                                                      | 70%*               |         |                    | (Kaletsky et al., 2018)                      |
| dmsr-1                                                        | 148%*              |         |                    | (Kaletsky et al., 2018)                      |
| <b>known FLP-1 GPCRs</b>                                      |                    |         |                    |                                              |
| frpr-7                                                        | 84%                | vj290   | 102%               | (Oranth et al., 2018)                        |
| npr-6                                                         | 74%*               | vj288   | 102%               | (Oranth et al., 2018)                        |
| <b>GPCR that function in the intestine for other pathways</b> |                    |         |                    |                                              |
| npr-22                                                        | 82%                | ok1598  | 98%                | (Palamiuc et al., 2017)                      |
| npr-5                                                         | 89%                | ok1583  | 89%                | (Bhardwaj et al., 2020)                      |

\*denotes  $p < 0.05$ , compared to empty vector controls

\*\*denotes percentage of surviving animals normalized to empty vector animals were fed with bacteria expressing dsRNA corresponding to the

**Supplementary Table 3. Reagents**

| <b>Bacterial and Virus Strains</b>                                 |                                |                                     |
|--------------------------------------------------------------------|--------------------------------|-------------------------------------|
| OP50 <i>Escherichia coli</i>                                       | Caenorhabditis Genetics Center | WBStrain00041969                    |
| HT115(DE3) <i>Escherichia coli</i>                                 | Caenorhabditis Genetics Center | WBStrain00041079                    |
| <b>Chemicals, Peptides, and Recombinant Proteins</b>               |                                |                                     |
| juglone(5-Hydroxy-1,4-naphthlenedione)                             | Calbiochem                     | CAS 481-39-0<br>Cat# 420120-250MG   |
| thimerosal(2-(Ethylmercuriomercapto)benzoic acid sodium salt)      | Millipore Sigma                | CAS 54-64-8<br>Cat# 71230-50G       |
| Sodium Arsenite, 0.5% (w/v) Aqueous Solution                       | Thermo Fisher Scientific       | CAS 7784-46-5<br>Cat# 7140-16       |
| paraquat(1,1'-Dimethyl-4,4'-bipyridinium dichloride)               | Millipore Sigma                | CAS 75365-73-0<br>Cat# 856177-250MG |
| <b>Experimental Models: Organisms/Strains</b>                      |                                |                                     |
| EU1 <i>skn-1(zu67)/nT1</i>                                         | Caenorhabditis Genetics Center | WBStrain00007249                    |
| KP3905 <i>unc-17(e113)</i>                                         | this paper                     | N/A                                 |
| OJ1218 <i>unc-25(e156)</i>                                         | this paper                     | N/A                                 |
| MT6308 <i>eat-4(ky5)</i>                                           | Caenorhabditis Genetics Center | WBStrain00027259                    |
| GR1321 <i>tph-1(mg280)</i>                                         | Caenorhabditis Genetics Center | WBStrain00007901                    |
| CB1112 <i>cat-2(e1112)</i>                                         | Caenorhabditis Genetics Center | WBStrain00004246                    |
| MT13113 <i>tdc-1(n3419)</i>                                        | Caenorhabditis Genetics Center | WBStrain00027424                    |
| MT9455 <i>tbh-1(n3247)</i>                                         | Caenorhabditis Genetics Center | WBStrain00027363                    |
| OJ2424 <i>egl-3(nr3090)</i>                                        | this paper                     | N/A                                 |
| OJ2031 <i>egl-21(n476)</i>                                         | this paper                     | N/A                                 |
| KP3387 <i>sbt-1(ok901)</i>                                         | this paper                     | N/A                                 |
| KP2753 <i>pkc-1(nj3)</i>                                           | this paper                     | N/A                                 |
| OJ6555 <i>flp-1(ok2811)</i>                                        | this paper                     | N/A                                 |
| KP3948 <i>eri-1(mg366); lin-15b(n744)</i>                          | Caenorhabditis Genetics Center | WBStrain00023637                    |
| OJ2439 <i>npr-4(tm1782)</i>                                        | this paper                     | N/A                                 |
| OJ2497 <i>flp-1(ok2811); npr-4(tm1782)</i>                         | this paper                     | N/A                                 |
| AX1410 <i>flp-18(db99)</i>                                         | Caenorhabditis Genetics Center | WBStrain00000308                    |
| OJ2210 <i>flp-1(ok2811); flp-18(db99)</i>                          | this paper                     | N/A                                 |
| KP3948 <i>eri-1(mg366); lin-15b(n744)</i>                          | Caenorhabditis Genetics Center | WBStrain00023637                    |
| OJ1531 <i>idls7[skn-1B/C::GFP;rol-6(su1006)]; glo-1(zu391)</i>     | this paper                     | N/A                                 |
| OJ2176 <i>egl-3; idls7; glo-1</i>                                  | this paper                     | N/A                                 |
| OJ2280 <i>flp-1; idls7; glo-1</i>                                  | this paper                     | N/A                                 |
| OJ2515 <i>vjEx958[Pflp-1::flp-1(genomic)]; flp-1; idls7; glo-1</i> | this paper                     | N/A                                 |

|                                                                                                   |                                |                  |
|---------------------------------------------------------------------------------------------------|--------------------------------|------------------|
| OJ2608 <i>vjEx970</i> [ <i>Pflp-1::egl-3C::GFP</i> ]; <i>egl-3</i>                                | this paper                     | N/A              |
| OJ2173 <i>vjEx823</i> [ <i>Pges-1::egl-3C::GFP</i> ]; <i>egl-3</i>                                | this paper                     | N/A              |
| OJ2864 <i>vjEx958</i> ; <i>flp-1</i>                                                              | this paper                     | N/A              |
| CL2166 <i>dvIs19</i> [ <i>pAF15</i> ( <i>Pgst-4::GFP::NLS</i> )]                                  | Caenorhabditis Genetics Center | WBStrain00005102 |
| OJ2536 <i>egl-3</i> ; <i>dvIs19</i>                                                               | this paper                     | N/A              |
| OJ2538 <i>vjEx970</i> ; <i>egl-3</i> ; <i>dvIs19</i>                                              | this paper                     | N/A              |
| OJ2547 <i>flp-1</i> ; <i>dvIs19</i>                                                               | this paper                     | N/A              |
| OJ2544 <i>vjEx958</i> ; <i>flp-1</i> ; <i>dvIs19</i>                                              | this paper                     | N/A              |
| OJ2609 <i>vjEx972</i> [ <i>Pflp-1::egl-3C::GFP</i> ]; <i>egl-3</i> ; <i>flp-1</i> ; <i>dvIs19</i> | this paper                     | N/A              |
| OJ2490 <i>vjEx979</i> [ <i>Pflp-1::flp-1B</i> ]; <i>flp-1</i>                                     | this paper                     | N/A              |
| OJ2829 <i>vjIs120</i> [ <i>Pflp-1::flp-1(genomic)::Venus</i> ]                                    | this paper                     | N/A              |
| OJ2493 <i>vjEx982</i> [ <i>Pflp-1::flp-1(P1+P2+P3+P4)</i> ]; <i>flp-1</i>                         | this paper                     | N/A              |
| OJ2688 <i>vjEx1039</i> [ <i>Pflp-1::flp-1(P1+P2+P3)</i> ]; <i>flp-1</i>                           | this paper                     | N/A              |
| OJ2694 <i>vjEx1045</i> [ <i>Pflp-1::flp-1(P1+P2)</i> ]; <i>flp-1</i>                              | this paper                     | N/A              |
| OJ2700 <i>vjEx1051</i> [ <i>Pflp-1::flp-1(P1)</i> ]; <i>flp-1</i>                                 | this paper                     | N/A              |
| OJ2704 <i>vjEx1055</i> [ <i>Pflp-1::flp-1(SS)</i> ]; <i>flp-1</i>                                 | this paper                     | N/A              |
| TJ356 <i>zIs356</i> [ <i>daf-16A/B::GFP</i> ; <i>rol-6(su1006)</i> ]                              | Caenorhabditis Genetics Center | WBStrain00034892 |
| OJ2344 <i>egl-3</i> ; <i>zIs356</i>                                                               | this paper                     | N/A              |
| SJ4100 <i>zcls13</i> [ <i>hsp-6::GFP</i> ]                                                        | Caenorhabditis Genetics Center | WBStrain00034068 |
| OJ4398 <i>egl-3</i> ; <i>zcls13</i>                                                               | this paper                     | N/A              |
| OJ2542 <i>vjIs120</i> ; <i>dvIs19</i>                                                             | this paper                     | N/A              |
| OJ2638 <i>vjEx1016</i> [ <i>Pflp-1::mito-miniSOG</i> ; <i>Ptx-3::RFP</i> ]                        | this paper                     | N/A              |
| OJ2641 <i>vjEx1019</i> [ <i>Pflp-1(513)::mito-miniSOG</i> ]                                       | this paper                     | N/A              |
| OJ2644 <i>vjEx1022</i> [ <i>Pflp-18::mito-miniSOG</i> ; <i>Ptx-3::RFP</i> ]                       | this paper                     | N/A              |
| CZ14478 <i>juEx1337</i> [ <i>Pnmr-1::mito-miniSOG</i> ; <i>Pnmr-1::mCherry</i> ]                  | (Yingchuan B. Qi et al., 2012) | N/A              |
| CZ15166 <i>juEx3802</i> [ <i>Psra-11::mito-miniSOG</i> ; <i>Psra-11::mCherry</i> ]                | (Yingchuan B. Qi et al., 2012) | N/A              |
| OJ2852 <i>vjEx1081</i> [ <i>Ptx-3::mito-miniSOG</i> ; <i>Ptx-3::RFP</i> ]                         | this paper                     | N/A              |
| OJ7277 <i>vjEx1146</i> [ <i>Ptx-3::TeTx</i> ]                                                     | this paper                     | N/A              |
| OJ7278 <i>vjEx1091</i> [ <i>Ptx-3::egl-3C::GFP</i> ]; <i>egl-3</i>                                | this paper                     | N/A              |
| OJ7279 <i>vjEx1091</i> ; <i>egl-3</i> ; <i>flp-1</i>                                              | this paper                     | N/A              |
| OJ7280 <i>vjIs120</i> ; <i>flp-1</i>                                                              | this paper                     | N/A              |
| OJ3614 <i>vjIs150</i> [ <i>Ptx-3::flp-1(genomic)::Venus</i> ; <i>Pofm-1::mCherry</i> ]            | this paper                     | N/A              |
| OJ3615 <i>vjIs151</i> [ <i>Ptx-3::flp-1(genomic)::Venus</i> ; <i>Pofm-1::mCherry</i> ]            | this paper                     | N/A              |
| OJ7281 <i>vjEx1124</i> [ <i>Ptx-3::Chr2::GFP</i> ]; <i>vjIs150</i>                                | this paper                     | N/A              |
| OJ3809 <i>unc-31(e928)</i> ; <i>vjIs150</i>                                                       | this paper                     | N/A              |
| OJ4511 <i>unc-2(lj1)</i> ; <i>vjIs150</i>                                                         | this paper                     | N/A              |
| OJ7282 <i>npr-4</i> ; <i>vjIs150</i>                                                              | this paper                     | N/A              |
| OJ2676 <i>vjEx1032</i> [ <i>Pofm-1::npr-4A</i> ]; <i>npr-4</i>                                    | this paper                     | N/A              |
| OJ2678 <i>vjEx1034</i> [ <i>Prab-3::npr-4A</i> ]; <i>npr-4</i>                                    | this paper                     | N/A              |

|                                                                                              |                                     |     |
|----------------------------------------------------------------------------------------------|-------------------------------------|-----|
| OJ2859 <i>vjEx1088[Pges-1::npr-4A]; npr-4</i>                                                | this paper                          | N/A |
| OJ2537 <i>npr-4; dvls19</i>                                                                  | this paper                          | N/A |
| OJ2549 <i>flp-1; npr-4; dvls19</i>                                                           | this paper                          | N/A |
| OJ7283 <i>npr-4; vjls120; dvls19</i>                                                         | this paper                          | N/A |
| OJ4737 <i>vjls217[Pttx-3::mito-HyPer; Pttx-3::tomm-20::mCherry]</i>                          | this paper                          | N/A |
| OJ4737 <i>vjls218[Pttx-3::mito-HyPer; Pttx-3::tomm-20::mCherry]</i>                          | this paper                          | N/A |
| OJ5238 <i>sod-2(ok1030); vjls217</i>                                                         | this paper                          | N/A |
| OJ7284 <i>vjEx1081; vjls218</i>                                                              | this paper                          | N/A |
| OJ4739 <i>trx-2(tm2720); vjls218</i>                                                         | this paper                          | N/A |
| OJ5248 <i>pkc-1; vjls217</i>                                                                 | this paper                          | N/A |
| OJ5236 <i>unc-31; vjls217</i>                                                                | this paper                          | N/A |
| OJ5304 <i>vjls287[Pttx-3::flp-18::Venus; Pofm-1::mCherry]</i>                                | this paper                          | N/A |
| OJ7285 <i>unc-31; vjls287</i>                                                                | this paper                          | N/A |
| OJ7286 <i>vjEx1138[Pttx-3::ss-Venus]</i>                                                     | this paper                          | N/A |
| OJ5730 <i>vjEx1700[Pttx-3::flp-1(genomic)::mCherry; Pttx-3::flp-18(genomic)::Venus]</i>      | this paper                          | N/A |
| OJ6376 <i>vjEx2015[Pflp-1(513)::flp-1(genomic)::Venus; Pofm-1::mCherry]</i>                  | this paper                          | N/A |
| OJ6633 <i>unc-31; vjEx2015</i>                                                               | this paper                          | N/A |
| OJ221 <i>nuls195[Punc-129::ins-22::Venus]</i>                                                | this paper; (Sieburth et al., 2006) | N/A |
| OJ4515 <i>sod-2; vjls150</i>                                                                 | this paper                          | N/A |
| OJ4235 <i>vjEx1391[Pttx-3::sod-2]; sod-2; vjls150</i>                                        | this paper                          | N/A |
| OJ5665 <i>vjEx1664[Pttx-3::sod-2(<math>\Delta</math>MLS)]; sod-2; vjls150</i>                | this paper                          | N/A |
| OJ3806 <i>ric-7(n2657); vjls150</i>                                                          | this paper                          | N/A |
| OJ7287 <i>vjEx1081; vjls150</i>                                                              | this paper                          | N/A |
| OJ7288 <i>vjEx1081; sod-2; vjls150</i>                                                       | this paper                          | N/A |
| OJ7289 <i>vjEx1081; ric-7; vjls150</i>                                                       | this paper                          | N/A |
| OJ7290 <i>vjEx1081; unc-31; vjls150</i>                                                      | this paper                          | N/A |
| OJ7291 <i>prdx-3(gk529); vjls150</i>                                                         | this paper                          | N/A |
| OJ4506 <i>trx-2; vjls150</i>                                                                 | this paper                          | N/A |
| OJ4201 <i>vjEx1361[Pttx-3::trx-2A]; trx-2; vjls150</i>                                       | this paper                          | N/A |
| OJ4209 <i>vjEx1369[Pttx-3::trx-2A(<math>\Delta</math>MLS)]; trx-2; vjls150</i>               | this paper                          | N/A |
| OJ4212 <i>vjEx1372[Pttx-3::trx-2A(<math>\Delta</math>CAT)]; trx-2; vjls150</i>               | this paper                          | N/A |
| OJ7292 <i>sod-1(tm783); vjls150</i>                                                          | this paper                          | N/A |
| OJ4512 <i>sod-3(tm760); vjls150</i>                                                          | this paper                          | N/A |
| OJ7293 <i>sod-4(gk101); vjls150</i>                                                          | this paper                          | N/A |
| OJ7294 <i>sod-5(tm1146); vjls150</i>                                                         | this paper                          | N/A |
| OJ4805 <i>vjEx1503[Pttx-3::sod-2::GFP; Pttx-3::tomm-20::mCherry]</i>                         | this paper                          | N/A |
| OJ5734 <i>vjEx1704[Pttx-3::sod-2(<math>\Delta</math>MLS)::GFP; Pttx-3::tomm-20::mCherry]</i> | this paper                          | N/A |
| OJ7295 <i>prdx-2(gk169); vjls150</i>                                                         | this paper                          | N/A |
| OJ4215 <i>vjEx1375[Pttx-3::trx-2A::GFP; Pttx-3::tomm-20::mCherry]</i>                        | this paper                          | N/A |

|                                                                                               |                                     |     |
|-----------------------------------------------------------------------------------------------|-------------------------------------|-----|
| OJ4259 <i>vjEx1416</i> [ <i>Pttx-3::trx-2A(ΔMLS)::GFP; Pttx-3::tomm-20::mCherry</i> ]         | this paper                          | N/A |
| OJ4014 <i>trx-2(tm2407); vjls151</i>                                                          | this paper                          | N/A |
| OJ4734 <i>vjls213</i> [ <i>Pttx-3::flp-1(genomic)::Venus; Pttx-3::tomm-20::mCherry</i> ]      | this paper                          | N/A |
| OJ4733 <i>vjls212</i> [ <i>Pttx-3::flp-1(genomic)::Venus; Pttx-3::tomm-20::mCherry</i> ]      | this paper                          | N/A |
| OJ5274 <i>ric-7; vjls213</i>                                                                  | this paper                          | N/A |
| OJ5250 <i>unc-104(e1265); vjls212</i>                                                         | this paper                          | N/A |
| OJ5787 <i>ric-7; unc-104; vjls213</i>                                                         | this paper                          | N/A |
| OJ5739 <i>vjEx1709</i> [ <i>Pttx-3::mito-truck; ric-7; vjls213</i> ]                          | this paper                          | N/A |
| OJ7296 <i>unc-104; vjls150</i>                                                                | this paper                          | N/A |
| OJ5786 <i>ric-7; unc104; vjls150</i>                                                          | this paper                          | N/A |
| OJ5736 <i>vjEx1706</i> [ <i>Pttx-3::mito-truck; ric-7; vjls150</i> ]                          | this paper                          | N/A |
| OJ3827 <i>pkc-1; vjls150</i>                                                                  | this paper                          | N/A |
| OJ4510 <i>trx-2; pkc-1; vjls150</i>                                                           | this paper                          | N/A |
| OJ4223 <i>vjEx1383</i> [ <i>Pttx-3::pkc-1A</i> ]; <i>pkc-1; vjls150</i>                       | this paper                          | N/A |
| OJ4233 <i>vjEx1389</i> [ <i>Pttx-3::pkc-1A(A160E)</i> ]; <i>vjls150</i>                       | this paper                          | N/A |
| OJ5725 <i>vjEx1389; ric-7; vjls150</i>                                                        | this paper                          | N/A |
| OJ5726 <i>vjEx1389; sod-2; vjls150</i>                                                        | this paper                          | N/A |
| OJ5727 <i>vjEx1389; unc-104; vjls150</i>                                                      | this paper                          | N/A |
| OJ4818 <i>vjEx1516</i> [ <i>Pttx-3::pkc-1A(C524S)</i> ]; <i>pkc-1; vjls150</i>                | this paper                          | N/A |
| OJ5678 <i>vjEx1677</i> [ <i>Pttx-3::pkc-1A(C524D)</i> ]; <i>pkc-1; vjls150</i>                | this paper                          | N/A |
| KP4103 <i>pkc-1; nuls195</i>                                                                  | this paper; (Sieburth et al., 2006) | N/A |
| OJ7297 <i>vjEx2569</i> [ <i>Punc-129::pkc-1A</i> ]; <i>pkc-1; vjls150</i>                     | this paper                          | N/A |
| OJ5742 <i>vjEx1712</i> [ <i>Punc-129::pkc-1A(C524S)</i> ]; <i>pkc-1; vjls150</i>              | this paper                          | N/A |
| OJ5750 <i>vjEx1720</i> [ <i>Pttx-3::GFP-linker::pkc-1A; Pttx-3::tomm-20::mCherry</i> ]        | this paper                          | N/A |
| OJ6371 <i>vjEx2009</i> [ <i>Pttx-3::GFP-linker::pkc-1A(C524S); Pttx-3::tomm-20::mCherry</i> ] | this paper                          | N/A |
| OJ6374 <i>vjEx2012</i> [ <i>Pttx-3::GFP-linker::pkc-1A(C524D); Pttx-3::tomm-20::mCherry</i> ] | this paper                          | N/A |
| OJ4012 <i>osm-6(p811); vjls150</i>                                                            | this paper                          | N/A |
| OJ4010 <i>eat-2(ad1113); vjls150</i>                                                          | this paper                          | N/A |
| <b>Oligonucleotides</b>                                                                       |                                     |     |
| forward primer for <i>flp-1</i> promoter<br>ccccccGCATGCTATAGTTCCATCAACACATCC                 | this paper                          | N/A |
| reverse primer for <i>flp-1</i> promoter<br>ccccccGATAAAGTGAAGAAAACCAA                        | this paper                          | N/A |
| forward primer for <i>flp-1</i> cDNA/genomic DNA<br>ccccccCCTAGGaaaaATGACTCTGCTCTACCAAG       | this paper                          | N/A |
| reverse primer for <i>flp-1</i> cDNA/genomic DNA<br>ccccccACTAGTTGCGACCAAATTTACTATGGG         | this paper                          | N/A |

|                                                                                          |            |     |
|------------------------------------------------------------------------------------------|------------|-----|
| reverse primer for <i>flp-1B(P1+P2+P3)</i><br>ccccccACCGGTCTTTCCGAATCGCAAGAAG            | this paper | N/A |
| reverse primer for <i>flp-1B(P1+P2)</i><br>ccccccACCGGTTCTCGATCGAAGGA                    | this paper | N/A |
| reverse primer for <i>flp-1B(P1)</i><br>ccccccACCGGTTCCCATATCTCATAAAGT                   | this paper | N/A |
| reverse primer for <i>flp-1B(SS)</i><br>ccccccACCGGTTCTTTTTCCATCTTTTGACG                 | this paper | N/A |
| forward primer for mito-miniSOG<br>ccccccGCTAGCaaaaATGTCGGACACAATTCTTGG                  | this paper | N/A |
| reverse primer for mito-miniSOG<br>ccccccGGTACCTTATCCGGAAGATCCTCCAT                      | this paper | N/A |
| forward primer for <i>flp-1</i> promoter<br>ccccccTCCAATAGTTCCATCAACACATCC               | this paper | N/A |
| reverse primer for <i>flp-1</i> promoter<br>ccccccGGGCCCTGAAGAAAACCAA                    | this paper | N/A |
| reverse primer for <i>flp-1(513)</i> promoter<br>ccccccGGATCCGATAAAGTGAAGAAAACCAATGAAG   | this paper | N/A |
| forward primer for <i>flp-18</i> promoter<br>ccccccGCATGCAATCGGAGGTAGGTTTGA AAAA         | this paper | N/A |
| reverse primer for <i>flp-18</i> proter<br>ccccccGGATCCGTCTAACCCCTGAAATTATTATTTTA<br>G   | this paper | N/A |
| forward primer for <i>npr-4A</i> cDNA<br>ccccccGCTAGCaaaaATGTTACTGGAAATTGGCAC            | this paper | N/A |
| reverse primer for <i>npr-4A</i> cDNA<br>ccccccGGTACCTTAGAAAGAAGCCTTCCTTGGTAGC           | this paper | N/A |
| forward primer for mito-HyPer<br>ccccccGCTAGCAAAAATGTCCGTCCTGACGCCGC                     | this paper | N/A |
| reverse primer for mito-HyPer<br>ccccccCCATGGTTAAACCGCCTGTTTTAAACTTTAT<br>CGAAATGGC      | this paper | N/A |
| forward primer for <i>flp-18</i> genomic DNA<br>ccccccGCTAGCaaaaATGCAACGGTGGTCCGGGCGT    | this paper | N/A |
| reverse primer for <i>flp-18</i> genomic DNA<br>ccccccACCGGTGTTCTCCGATTCGGACGGAAG        | this paper | N/A |
| forward primer for <i>trx-2A</i> cDNA<br>ccccccGCTAGCaaaaATGCAGAAAGCACTTAAGCT            | this paper | N/A |
| reverse primer for <i>trx-2A</i> cDNA<br>ccccccGGTACCTTAAGCAGCGAGAACGTCCT                | this paper | N/A |
| forward primer for <i>trx-2A(ΔMLS)</i><br>ccccccGCTAGCaaaaATGGACATTGATTCTGTTGAAG<br>AT   | this paper | N/A |
| forward primer for <i>trx-2A(ΔCAT)</i><br>TTGATTTCCACGCAGAATGGTcaGGACCGTcaCAGG<br>CTTTGG | this paper | N/A |
| reverse primer for <i>trx-2A(ΔCAT)</i><br>AGTCTTGGTCCCAAAGCCTGtgACGGTCCtgACCATT<br>CTGCG | this paper | N/A |
| reverse primer for <i>trx-2A</i> cDNA<br>ccccccACCGGTAGCAGCGAGAACGTCCT                   | this paper | N/A |
| forward primer for mito-truck<br>ccccccGCTAGCaaaaATGGAGCCGCGGACAGACG                     | this paper | N/A |
| reverse primer for mito-truck<br>ccccccGGTACCTATCCCCAGAGAAGACTCATGGC                     | this paper | N/A |

|                                                                                              |            |             |
|----------------------------------------------------------------------------------------------|------------|-------------|
| forward primer for <i>sod-2</i> cDNA<br>ccccccGCTAGCaaaaATGCTTCAAAACACCGTTTCG                | this paper | N/A         |
| reverse primer for <i>sod-2</i> cDNA<br>ccccccGGTACCTTATTGCTGTGCCTTTGCAA                     | this paper | N/A         |
| reverse primer for <i>sod-2</i> cDNA<br>ccccccACCGGTTTATTGCTGTGCCTTTGCAA                     | this paper | N/A         |
| reverse primer for <i>trx-2A(ΔMLS)</i> cDNA<br>CCCCCGCGATCGCAAAAATGGACATTGATTCTGTT<br>GAAGAT | this paper | N/A         |
| forward primer for <i>pkc-1A(C524S)</i> cDNA<br>GGCAGATTTTGGGAATGTcCAAGGAAGGAATTAACAA<br>GGA | this paper | N/A         |
| reverse primer for <i>pkc-1A(C524S)</i> cDNA<br>TTAATTCCTTCCTTGgACATTCCAAAATCTGCCAAAC        | this paper | N/A         |
| forward primer for <i>sod-2(ΔMLS)</i> cDNA<br>ccccccGCTAGCaaaaatgACAGGAGTCGCTGCTGTT          | this paper | N/A         |
| forward primer for <i>pkc-1A(C524D)</i> cDNA<br>GGCAGATTTTGGGAATGgaCAAGGAAGGAATTAACAA<br>GGA | this paper | N/A         |
| reverse primer for <i>pkc-1A(C524D)</i> cDNA<br>TTAATTCCTTCCTTGtcCATTCCAAAATCTGCCAAAC        | this paper | N/A         |
| forward primer for <i>pkc-1A</i> cDNA<br>ccccccACCGGTAAATTCTTCAGTAGTCGG                      | this paper | N/A         |
| reverse primer for <i>pkc-1A</i> cDNA<br>ggggggGGTACCTTAGTAGTAAAATGCGG                       | this paper | N/A         |
| <b>Recombinant DNA</b>                                                                       |            |             |
| pJQ04 <i>Pflp-1::flp-1(genomic)</i>                                                          | this paper | N/A         |
| pJQ07 <i>Pges-1::egl-3C::GFP</i>                                                             | this paper | N/A         |
| pJQ08 <i>Pflp-1::egl-3C::GFP</i>                                                             | this paper | N/A         |
| pJQ33 <i>Pflp-1::flp-1(genomic)::Venus</i>                                                   | this paper | N/A         |
| pJQ34 <i>Pflp-1::flp-1B</i>                                                                  | this paper | N/A         |
| pJQ35 <i>Pflp-1::flp-1B(P1+P2+P3+P4)</i>                                                     | this paper | N/A         |
| oJQ37 <i>Pofm-1::npr-4A</i>                                                                  | this paper | N/A         |
| pJQ38 <i>Prab-3::npr-4A</i>                                                                  | this paper | N/A         |
| pJQ39 <i>Pflp-1::flp-1B(P1+P2+P3)</i>                                                        | this paper | N/A         |
| pJQ40 <i>Pflp-1::flp-1B(P1+P2)</i>                                                           | this paper | N/A         |
| pJQ41 <i>Pflp-1::flp-1B(P1)</i>                                                              | this paper | N/A         |
| pJQ42 <i>Pflp-1::flp-1B(SS)</i>                                                              | this paper | N/A         |
| pJQ46 <i>Pflp-1::mito-miniSOG</i>                                                            | this paper | N/A         |
| pJQ47 <i>Pflp-1(513)::mito-miniSOG</i>                                                       | this paper | N/A         |
| pJQ48 <i>Pflp-18::mito-miniSOG</i>                                                           | this paper | N/A         |
| pJQ49 <i>Pflp-1(513)::flp-1(genomic)::Venus</i>                                              | this paper | N/A         |
| pJQ51 <i>Pttx-3::egl-3C::GFP</i>                                                             | this paper | N/A         |
| pJQ52 <i>Pttx-3::mito-miniSOG</i>                                                            | this paper | N/A         |
| pJQ54 <i>Pges-1::npr-4A</i>                                                                  | this paper | N/A         |
| pJQ60 <i>Pttx-3::flp-1(genomic)::Venus</i>                                                   | this paper | N/A         |
| pJQ61 <i>Pttx-3::Chr2::GFP</i>                                                               | this paper | N/A         |
| pJQ62 <i>Pttx-3::pkc-1A(A160E)</i>                                                           | this paper | N/A         |
| pJQ77 <i>Pttx-3::TeTx</i>                                                                    | this paper | N/A         |
| pJQ79 <i>Pttx-3::ss-Venus</i>                                                                | this paper | N/A         |
| FP942 pHyPer-dMito vector                                                                    | Evrogen    | cat.# FP942 |



|                                                              |            |     |
|--------------------------------------------------------------|------------|-----|
| pJQ107 <i>Pttx-3::mito-HyPer</i>                             | this paper | N/A |
| pJQ144 <i>Pttx-3::tomm-20::mCherry</i>                       | this paper | N/A |
| pJQ146 <i>Pttx-3::flp-18(genomic)::Venus</i>                 | this paper | N/A |
| pJQ155 <i>Pttx-3::trx-2A</i>                                 | this paper | N/A |
| pJQ165 <i>Pttx-3::trx-2A(<math>\Delta</math>MLS)</i>         | this paper | N/A |
| pJQ166 <i>Pttx-3::trx-2A(<math>\Delta</math>CAT)</i>         | this paper | N/A |
| pJQ168 <i>Pttx-3::trx-2A::GFP</i>                            | this paper | N/A |
| pJQ181 <i>Pttx-3::mito-truck(unc-116::GFP(1-10)::tomm-7)</i> | this paper | N/A |
| pJQ188 <i>Pttx-3::pkc-1A</i>                                 | this paper | N/A |
| pJQ190 <i>Pttx-3::sod-2</i>                                  | this paper | N/A |
| pJQ191 <i>Pttx-3::sod-2::GFP</i>                             | this paper | N/A |
| pJQ196 <i>Pttx-3::trx-2A(<math>\Delta</math>MLS)::GFP</i>    | this paper | N/A |
| pJQ229 <i>Pttx-3::flp-1(genomic)::mCherry</i>                | this paper | N/A |
| pJQ236 <i>Pttx-3::pkc-1A(C524S)</i>                          | this paper | N/A |
| pJQ245 <i>Pttx-3::sod-2(<math>\Delta</math>MLS)</i>          | this paper | N/A |
| pJQ249 <i>Pttx-3::sod-2(<math>\Delta</math>MLS)::GFP</i>     | this paper | N/A |
| pJQ270 <i>Punc-129::pkc-1A(C524S)</i>                        | this paper | N/A |
| pJQ271 <i>Punc-129::pkc-1A</i>                               | this paper | N/A |
| pJQ287 <i>Pttx-3::pkc-1A(C524D)</i>                          | this paper | N/A |
| pJQ293 <i>Pttx-3::GFP-linker::pkc-1A</i>                     | this paper | N/A |
| pJQ296 <i>Pttx-3::GFP-linker::pkc-1A(C524S)</i>              | this paper | N/A |
| pJQ306 <i>Pttx-3::GFP-linker::pkc-1A(C524D)</i>              | this paper | N/A |
